# Supplementary material
Source: PubMed Central journal article supplement (PMC6365968)

**Fig.S1**

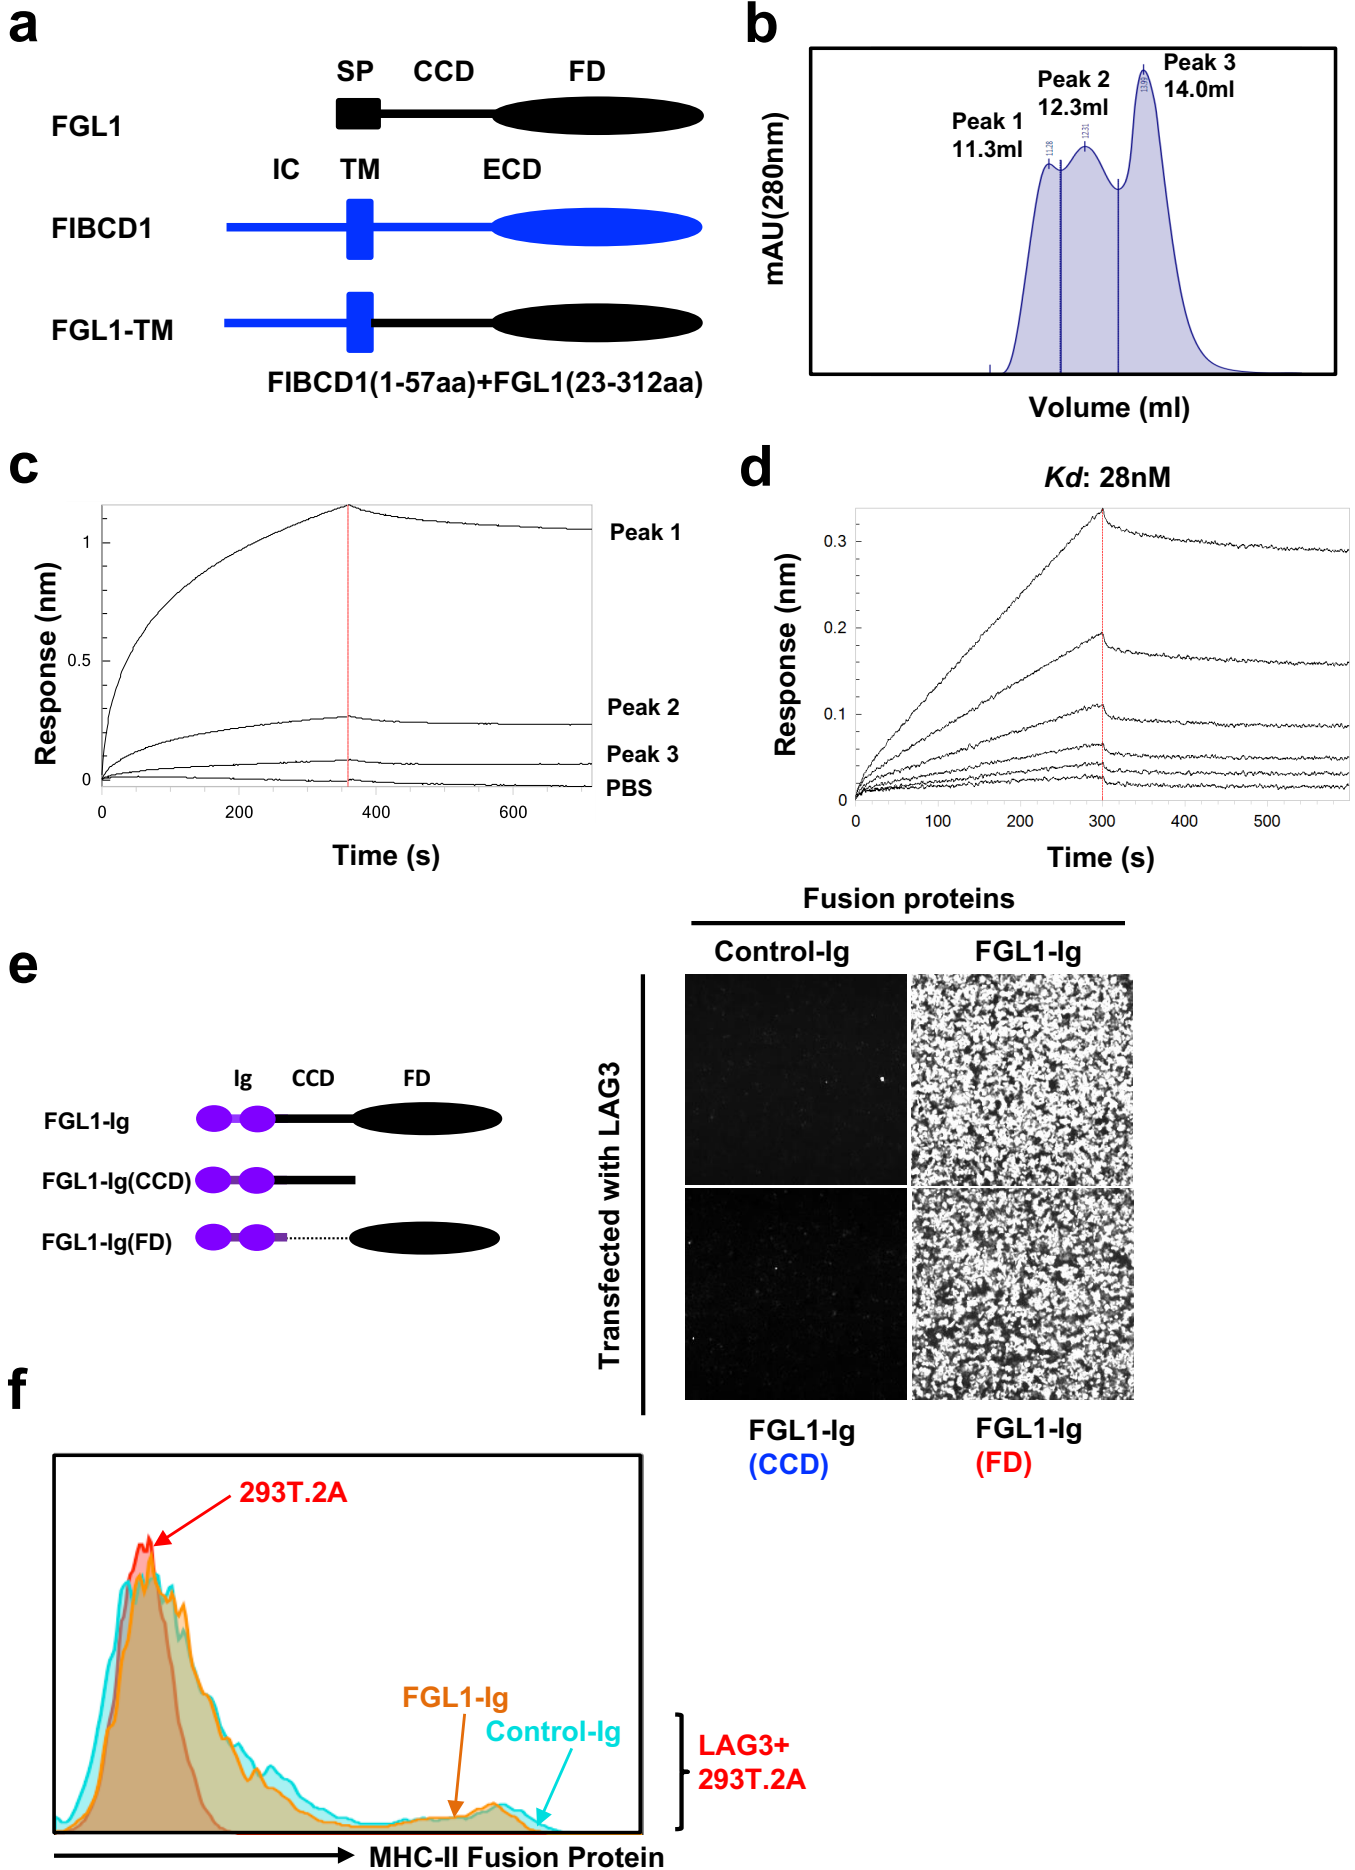

Supplement: NIHMS1516788-supplement-1.pdf [file NIHMS1516788-supplement-1.pdf]
