# Supplementary material
Source: PubMed Central journal article supplement (PMC6365968)

Fig.S2

a

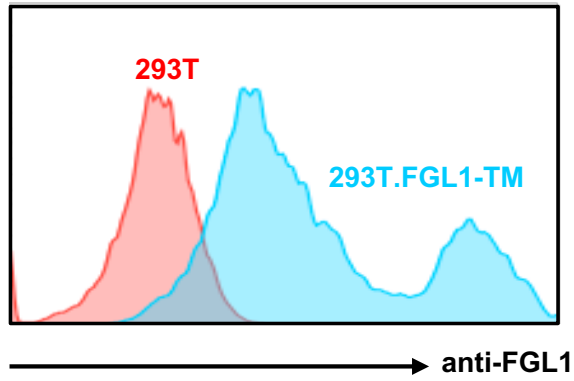

b

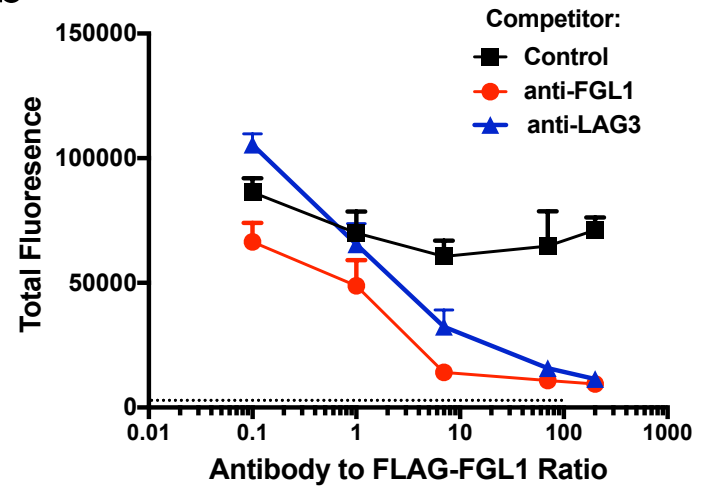

c

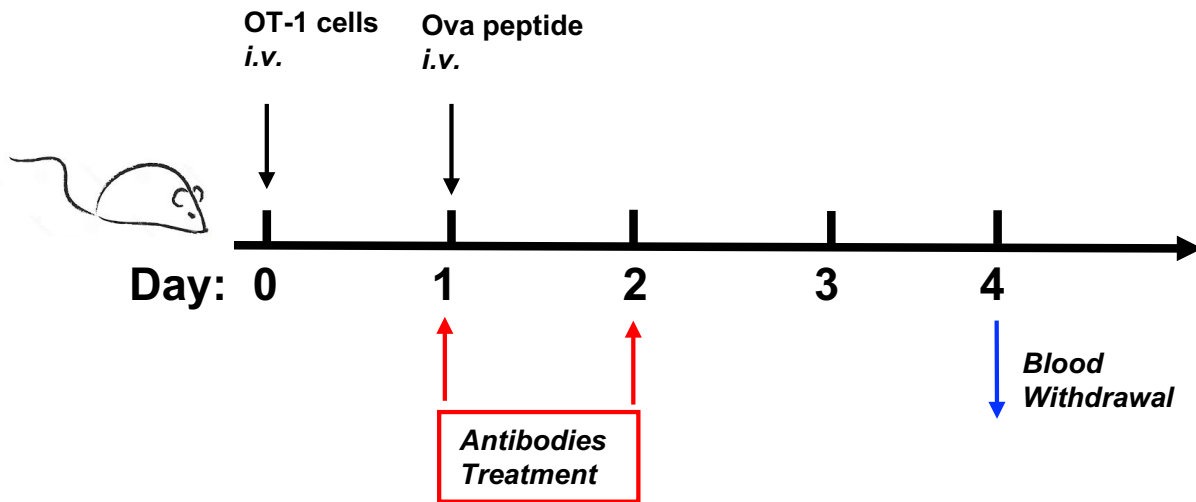

d

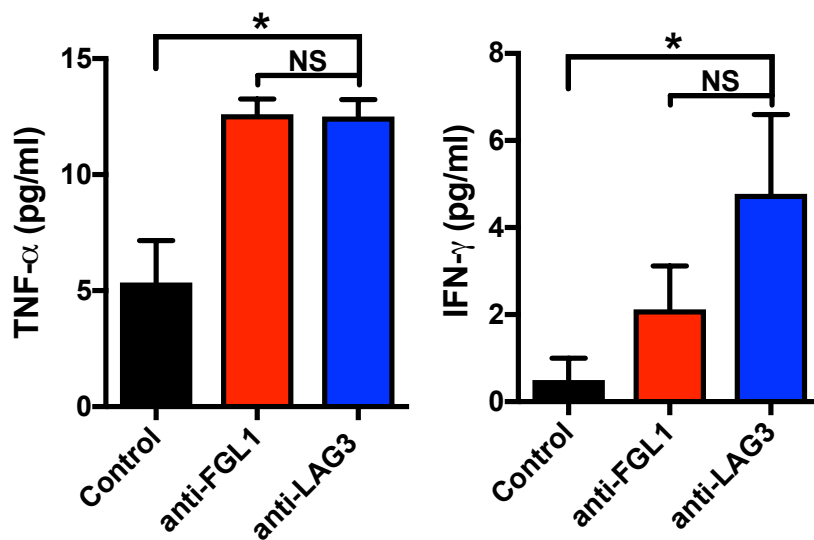

Supplement: NIHMS1516788-supplement-2.pdf [file NIHMS1516788-supplement-2.pdf]
