# Supplementary material
Source: PubMed Central journal article supplement (PMC6365968)

**Fig.S3**

**a**

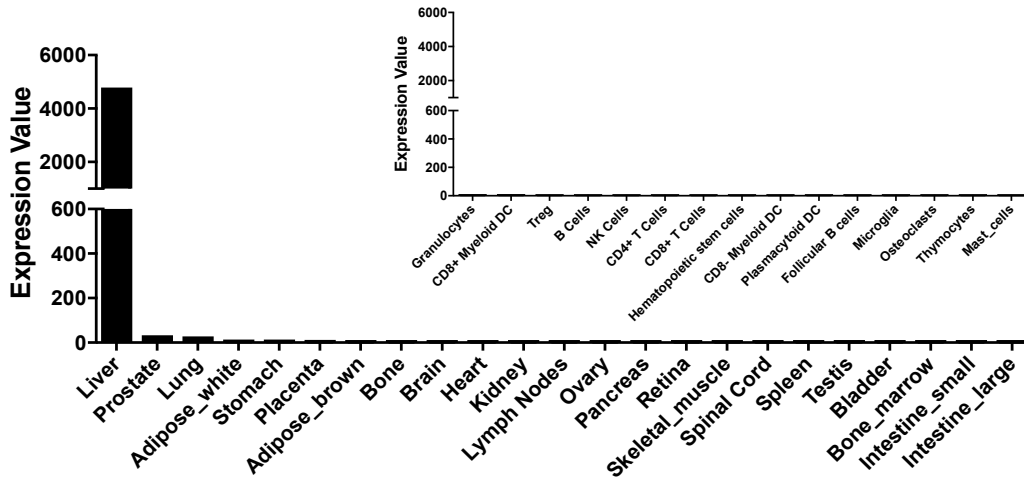

**b**

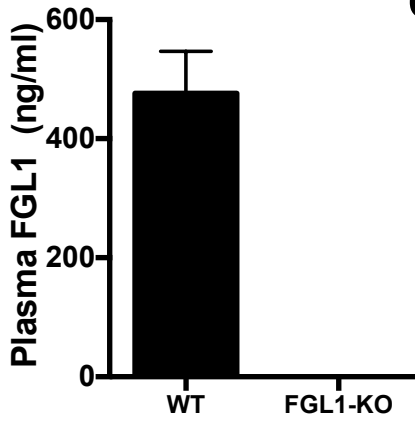

**d**

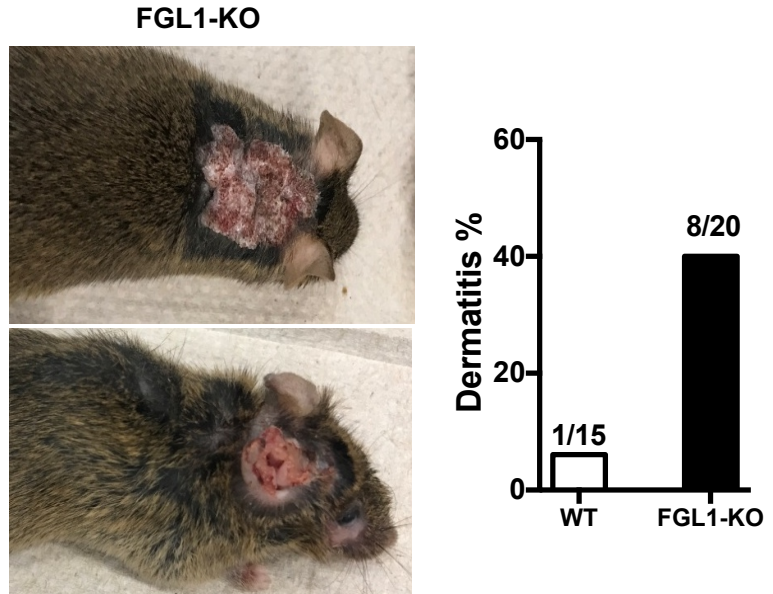

**c**

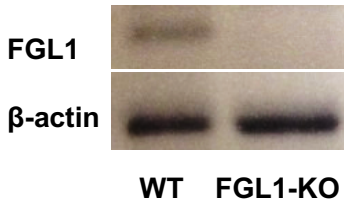

**e**

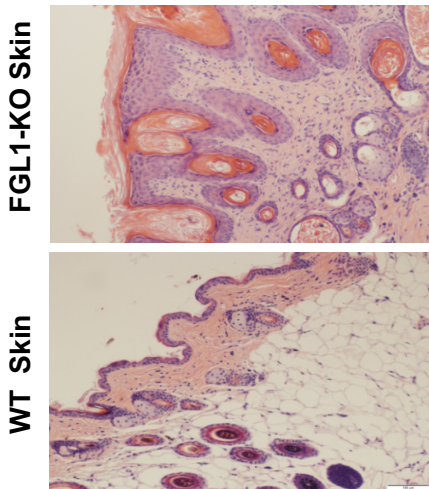

**f**

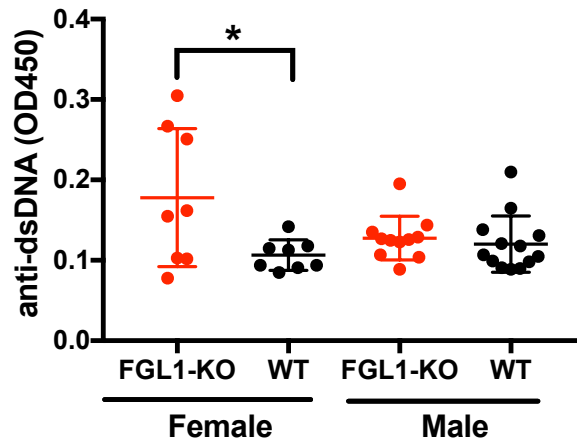

Supplement: NIHMS1516788-supplement-3.pdf [file NIHMS1516788-supplement-3.pdf]
