# Supplementary material
Source: PubMed Central journal article supplement (PMC6365968)

**Fig.S5**

**a**

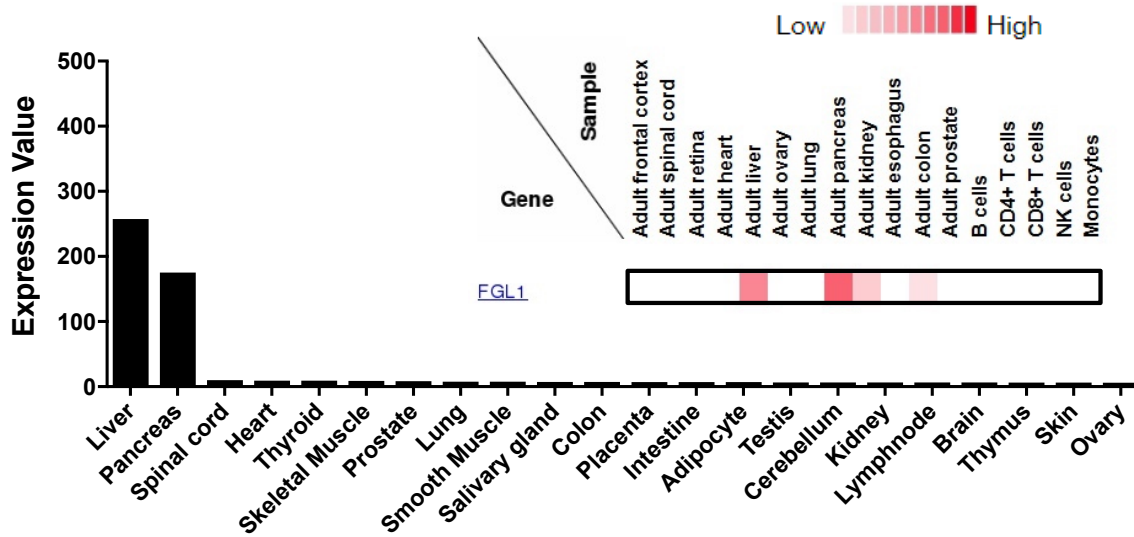

**b**

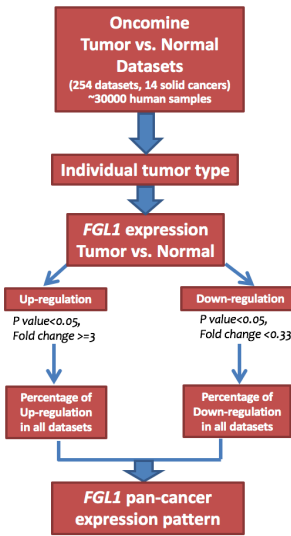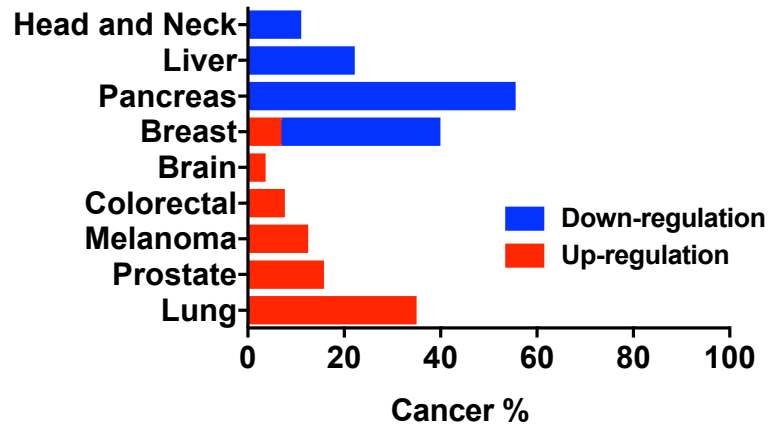

**c**

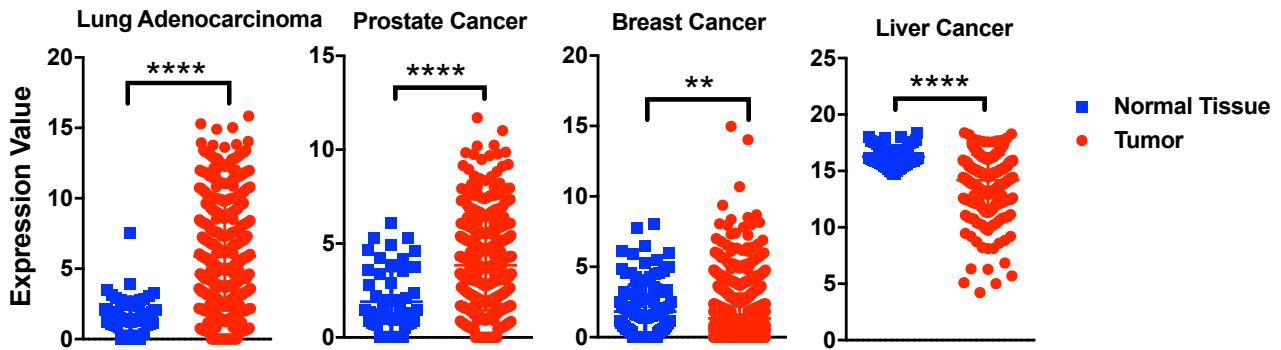

Supplement: NIHMS1516788-supplement-5.pdf [file NIHMS1516788-supplement-5.pdf]
