# Supplementary material
Source: PubMed Central journal article supplement (PMC6365968)
Supplement: NIHMS1516788-supplement-9.pdf [file NIHMS1516788-supplement-9.pdf]

**Table S3. Demographic information of the four patient cohorts, related to Figure 6.**

| Variables                   |          | Cohort#1                          | Cohort#2                         | Cohort#3                                      | Cohort#4                         |
|-----------------------------|----------|-----------------------------------|----------------------------------|-----------------------------------------------|----------------------------------|
|                             |          | Yale University<br>n=278<br>n (%) | UNAV University<br>n=18<br>n (%) | Fujian Medical<br>University<br>n=56<br>n (%) | Yale University<br>n=21<br>n (%) |
| Age                         | ≥60      | 205 (73.7)                        | 9 (50)                           | 32 (57.1)                                     | 14 (66.7)                        |
|                             | <60      | 73 (26.3)                         | 9 (50)                           | 24 (42.9)                                     | 7 (33.3)                         |
| Sex                         | Male     | 123 (44.2)                        | 14 (77.8)                        | 39 (69.6)                                     | 13 (61.9)                        |
|                             | Female   | 155 (55.8)                        | 4 (22.2)                         | 17 (30.4)                                     | 8 (38.1)                         |
| Smoking                     | Yes      | 214 (77.0)                        | 15 (83.3)                        | 41 (73.2)                                     | N/A                              |
|                             | No       | 43 (15.5)                         | 2 (11.1)                         | 15 (26.8)                                     | N/A                              |
|                             | Unknown  | 21 (7.5)                          | 1 (5.6)                          | 0 (0)                                         | N/A                              |
| Stage                       | I-IIIa   | 247 (88.8)                        | 0 (0)                            | 8 (14.3)                                      | 0 (0)                            |
|                             | IIIb-IV  | 31 (11.2)                         | 18 (100)                         | 34 (60.7)                                     | 21 (100)                         |
| Histology                   | ADC      | 147 (52.9)                        | 14 (77.8)                        | 22 (39.3)                                     | NA                               |
|                             | SCC      | 71 (25.5)                         | 4 (22.2)                         | 11 (19.6)                                     | NA                               |
|                             | Others   | 60 (21.6)                         | 0 (0)                            | 23 (41.1)                                     | NA                               |
|                             | Melanoma | NA                                | NA                               | NA                                            | 21 (100)                         |
| Previous systemic therapies | 0        | 238 (85.6)                        | 0 (0)                            | 29 (51.8)                                     | 1 (4.8)                          |
|                             | 1        | 21 (7.5)                          | 16 (88.9)                        | 24 (42.9)                                     | 15 (71.4)                        |
|                             | ≥2       | 19 (6.8)                          | 4 (22.2)                         | 3 (5.4)                                       | 5 (23.8)                         |

**Table S4. Summary of clinical response of the cohort#2 and #4 patients to anti-PD therapy, related to Figure 6.**

| Variables                        | <b>Cohort#2</b><br>UNAV University<br>n=18 | <b>Cohort#4</b><br>Yale University<br>n=21 |
|----------------------------------|--------------------------------------------|--------------------------------------------|
| <b>Median Follow-up, months</b>  | 8                                          | 15                                         |
| <b>Treatment-n (%)</b>           |                                            |                                            |
| Nivolumab                        | 20 (69)                                    | 15 (71.4)                                  |
| Pembrolizumab                    | 9 (31)                                     | 6 (28.6)                                   |
| <b>Best overall response</b>     |                                            |                                            |
| Complete Response                | 0                                          | 3 (14.3)                                   |
| Partial Response                 | 11 (57.9)                                  | 5 (23.8)                                   |
| Stable Disease                   | 1 (5.3)                                    | 1 (4.8)                                    |
| Progressive Disease              | 7 (36.8)                                   | 12 (57.1)                                  |
| <b>Progression-free survival</b> |                                            |                                            |
| Median                           | 10                                         | 5                                          |
| Range                            | 0-39                                       | 2.4-7.6                                    |
